# Supplementary material
Source: PubMed Central journal article supplement (PMC6076386)
Supplement: NIHMS982656-supplement-SuppInfo.pdf [file NIHMS982656-supplement-SuppInfo.pdf]

## **SUPPORTING INFORMATION**

### **Deciphering Conformational Changes Associated with the Maturation of Thrombin Anion Binding Exosite I**

*Ramya Billur<sup>†</sup>, David Ban<sup>‡</sup>, T. Michael Sabo<sup>‡</sup>, and Muriel C. Maurer<sup>†\*</sup>*

<sup>†</sup>Department of Chemistry, University of Louisville, Louisville, Kentucky 40292

<sup>‡</sup>Department of Medicine, James Graham Brown Cancer Center, University of Louisville,  
Louisville, KY 40202, USA

\*Corresponding author: Muriel C. Maurer  
Department of Chemistry  
University of Louisville  
Louisville, KY 40292  
Telephone: (502) 852-7008  
Email: [muriel.maurer@louisville.edu](mailto:muriel.maurer@louisville.edu)

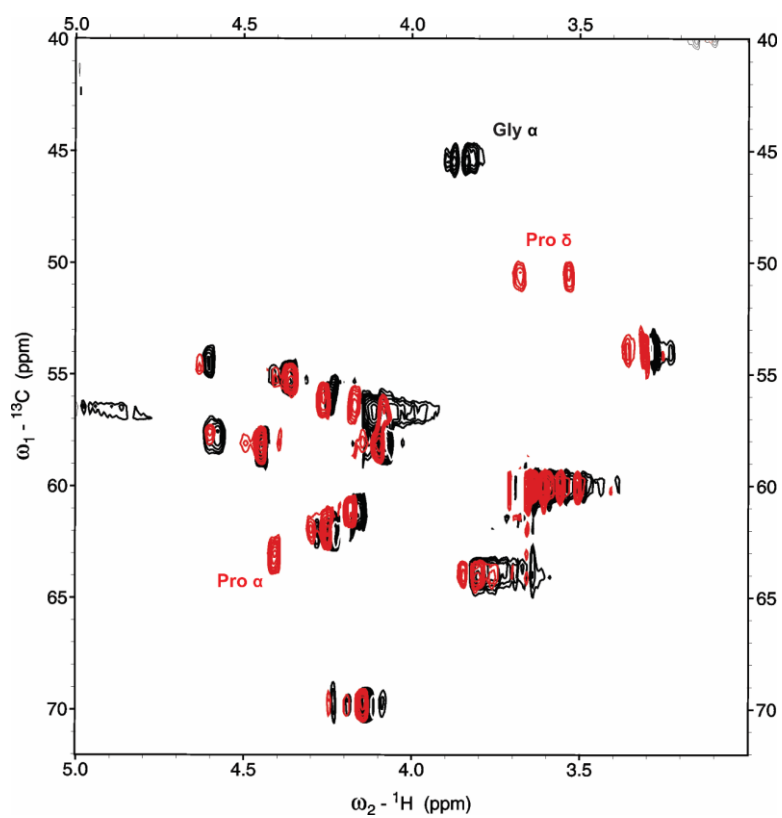

**Figure S1:** An overlay of the 2D  $^{13}\text{C}$ - $^1\text{H}$  natural abundance HSQC NMR spectra of 1 mM PAR3 (44-56) and 1mM PAR3G (44-56). All NMR samples were in 25mM  $\text{H}_3\text{PO}_4$ , 150 mM NaCl, 0.2 mM EDTA and 10 %  $\text{D}_2\text{O}$  (pH 6.5). The PAR3 residues are in red whereas the PAR3G are in black. The expected cross peaks for the unique residues Pro51 versus Gly51 are labeled.

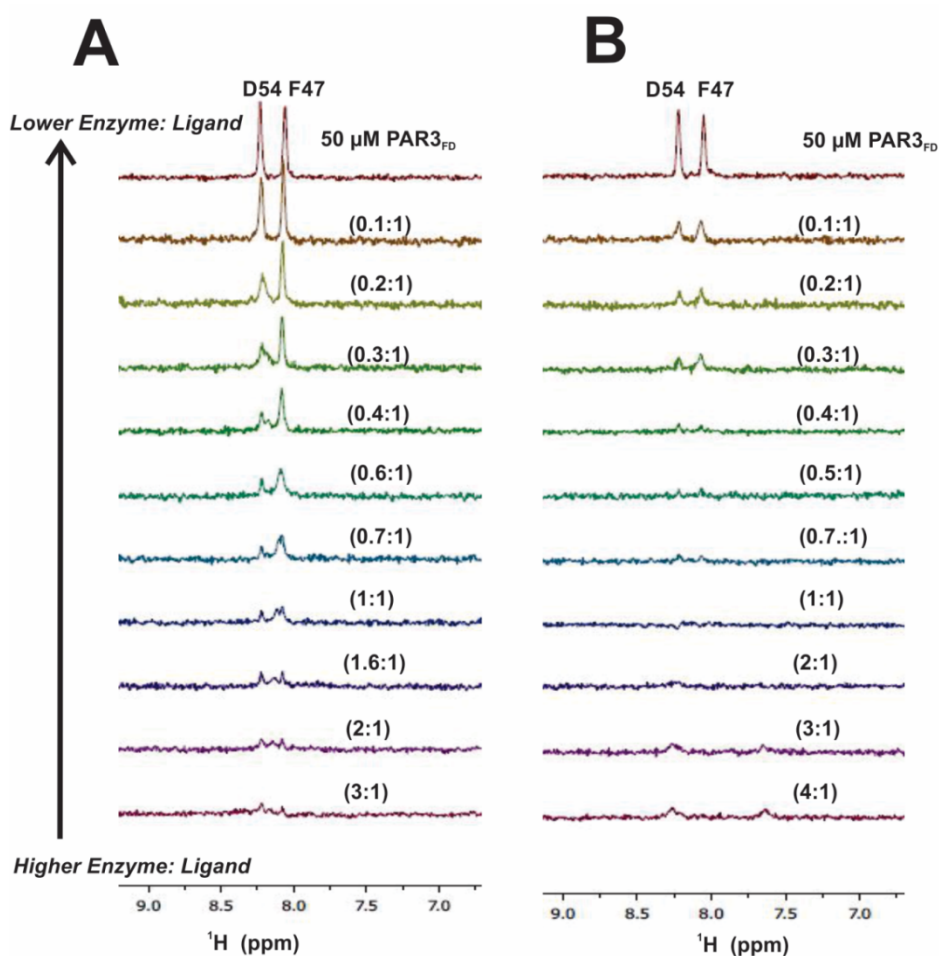

**Figure S2: 1D  $^{15}\text{N}$ -HSQC NMR titrations of PAR3<sub>FD</sub> (44-56) in the presence of ProT and PPACK- IIa**  
 All NMR samples were in 25mM  $\text{H}_3\text{PO}_4$ , 150 mM NaCl, 0.2 mM EDTA and 10 %  $\text{D}_2\text{O}$  (pH 6.5). **(A)** For the PAR3<sub>FD</sub> binding studies with ProT, starting complexes included 50  $\mu\text{M}$  PAR3<sub>FD</sub> (44-56,  $^{15}\text{N}$ -F47,  $^{15}\text{N}$ -D54) in 137  $\mu\text{M}$  ProT. The serial dilutions resulted in ProT to PAR3 ratios that spanned from 3:1 to 0.1:1. **(B)** For PPACK- IIa, starting complexes included 50  $\mu\text{M}$  PAR3<sub>FD</sub> (44-56,  $^{15}\text{N}$ -F47,  $^{15}\text{N}$ -D54) in 210  $\mu\text{M}$  PPACK- IIa. The serial dilutions resulted in PPACK- IIa to PAR3<sub>FD</sub> ratios that spanned from 4:1 to 0.1:1. Representative data sets are shown.

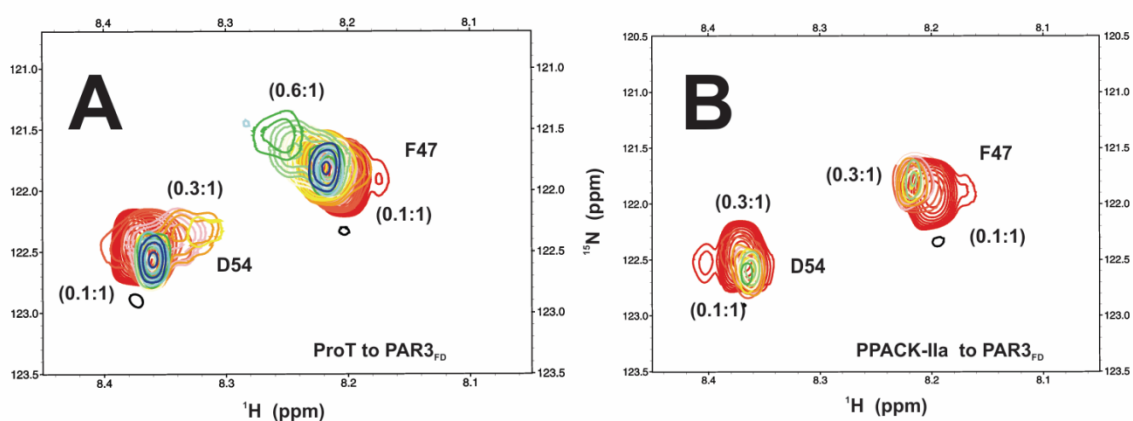

**Figure S3:** 2D  $^1\text{H}$ - $^{15}\text{N}$  HSQC NMR titrations of PAR3<sub>FD</sub> (44-56) in the presence of ProT and PPACK-IIa. All NMR samples were in 25mM  $\text{H}_3\text{PO}_4$ , 150 mM NaCl, 0.2 mM EDTA and 10 %  $\text{D}_2\text{O}$  (pH 6.5). **(A)** For the PAR3<sub>FD</sub> binding studies with ProT, starting complexes included 50  $\mu\text{M}$  PAR3<sub>FD</sub> (44-56,  $^{15}\text{N}$ -F47,  $^{15}\text{N}$ -D54) in 130  $\mu\text{M}$  ProT. The serial dilutions resulted in ProT to PAR3<sub>FD</sub> ratios that spanned from 3:1 to 0.1:1. **(B)** For PPACK -IIa, starting complexes included 50  $\mu\text{M}$  PAR3<sub>FD</sub> (44-56,  $^{15}\text{N}$ -F47,  $^{15}\text{N}$ -D54) in 210  $\mu\text{M}$  PPACK-IIa. The serial dilutions resulted in PPACK-IIa to PAR3<sub>FD</sub> ratios that spanned from 4:1 to 0.1:1. Representative data sets are shown. Colors for the HSQC crosspeaks span from blue (highest protein-peptide ratio) to red (free peptide).

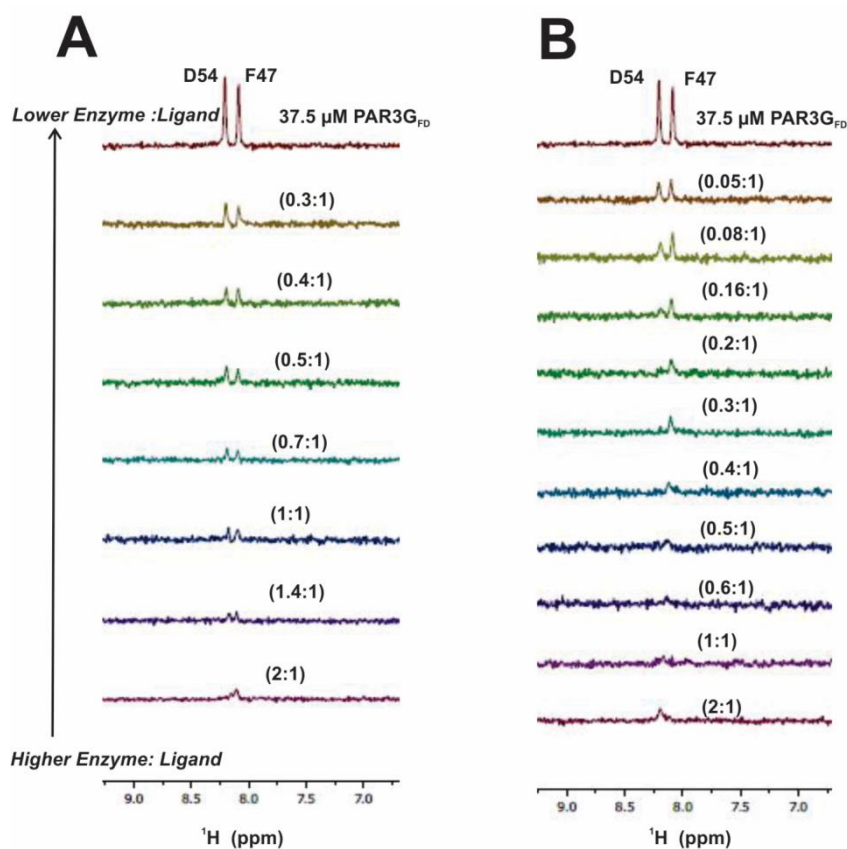

**Figure S4: 1D <sup>15</sup>N-HSQC NMR titrations of PAR3G<sub>FD</sub> (44-56) in the presence of ProT and PPACK- IIa** All NMR samples were in 25mM H<sub>3</sub>PO<sub>4</sub>, 150 mM NaCl, 0.2 mM EDTA and 10 % D<sub>2</sub>O (pH 6.5). **(A)** For the PAR3G<sub>FD</sub> binding studies with ProT, starting complexes included 37.5 μM PAR3G<sub>FD</sub> (44-56, <sup>15</sup>N-F47, <sup>15</sup>N-D54) in 70 μM ProT. The serial dilutions resulted in ProT to PAR3G ratios that spanned from 2:1 to 0.3:1. **(B)** For PPACK- IIa, starting complexes included 37.5 μM PAR3G<sub>FD</sub> (44-56, <sup>15</sup>N-F47, <sup>15</sup>N-D54) in 70 μM PPACK- IIa. The serial dilutions resulted in PPACK- IIa to PAR3G<sub>FD</sub> ratios that spanned from 2:1 to 0.05:1. Representative data sets are shown.

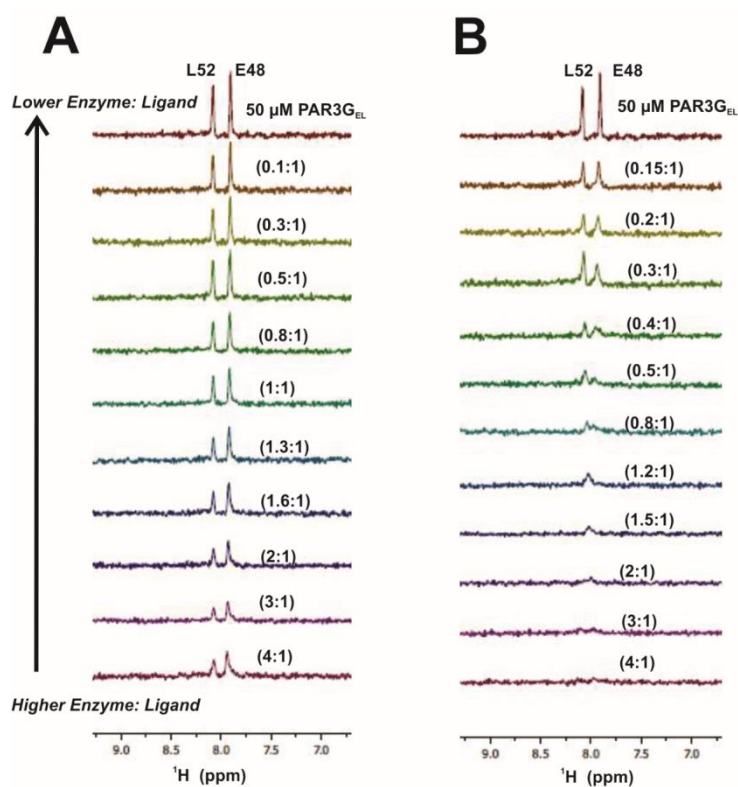

**Figure S5:**  $^{15}\text{N}$  HSQC NMR titrations of PAR3G<sub>EL</sub> (44-56) in the presence of ProT and PPACK- IIa. All NMR samples were in 25mM H<sub>3</sub>PO<sub>4</sub>, 150 mM NaCl, 0.2 mM EDTA and 10 % D<sub>2</sub>O (pH 6.5). **(A)** For the PAR3G<sub>EL</sub> binding studies with ProT, starting complexes included 50  $\mu\text{M}$  PAR3G<sub>EL</sub> (44-56,  $^{15}\text{N}$ -E48,  $^{15}\text{N}$ -L52) in 180  $\mu\text{M}$  ProT. The serial dilutions resulted in ProT to PAR3G ratios that spanned from 4:1 to 0.1:1. **(B)** For PPACK- IIa, starting complexes included 50  $\mu\text{M}$  PAR3G<sub>EL</sub> (44-56,  $^{15}\text{N}$ -E48,  $^{15}\text{N}$ -L52) in 211  $\mu\text{M}$  PPACK- IIa. The serial dilutions resulted in PPACK- IIa to PAR3G<sub>EL</sub> ratios that spanned from 4:1 to 0.1:1. Representative data sets are shown.

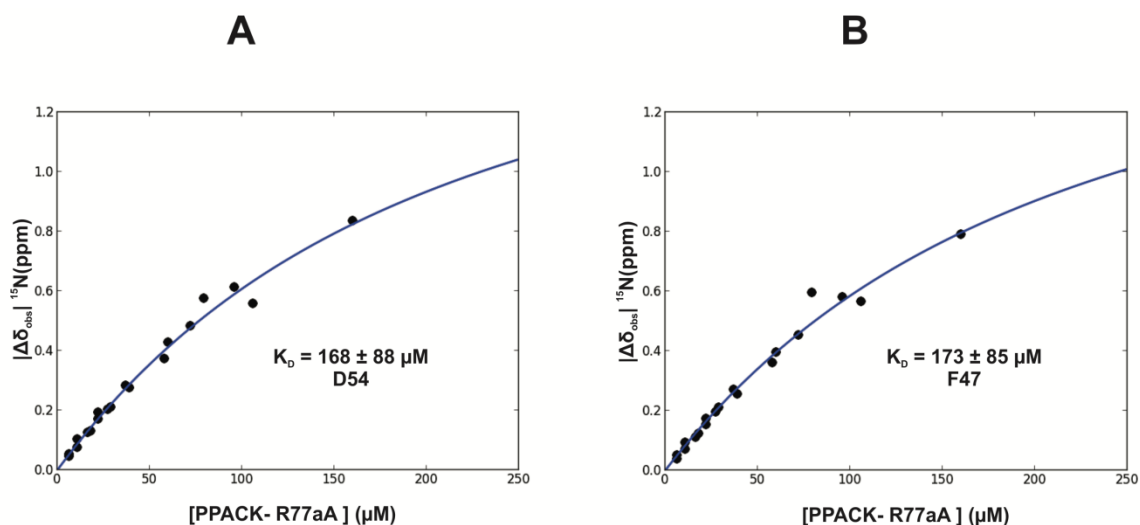

**Figure S6: Determination of Binding Affinity ( $K_D$ ) for  $^{15}\text{N}$ -labeled F47 and D54 of PAR3G<sub>FD</sub> interacting with PPACK-R77aA IIa** For this NMR titration series, the peptide ligand concentration was kept constant and the ProT and PPACK-R77aA IIa concentrations were serially diluted. As a result, the NMR titrations were measuring the binding of protein to a defined peptide concentration. (A) Interactions between PPACK-R77aA IIa and PAR3G  $^{15}\text{N}$ -D54 led to a  $K_D = 168 \pm 88 \mu\text{M}$  and (B) ProT and PAR3G  $^{15}\text{N}$ -F47 led to a  $K_D = 173 \pm 85 \mu\text{M}$ . NMR titrations were done in duplicate. The reported  $K_D$  values were determined using in-house scripts written using Python. The term  $|\Delta\delta_{\text{obs}}|^{15\text{N}}\text{ppm} = \delta^{15\text{N}}_{\text{Bound}} - \delta^{15\text{N}}_{\text{Free}}$  reflects the absolute difference in chemical shift between the bound and free states of the particular  $^{15}\text{N}$ -amide. Error analysis was carried out using a Monte-Carlo approach assuming a 10% error in the serially diluted protein samples. See Materials and Methods for more details.

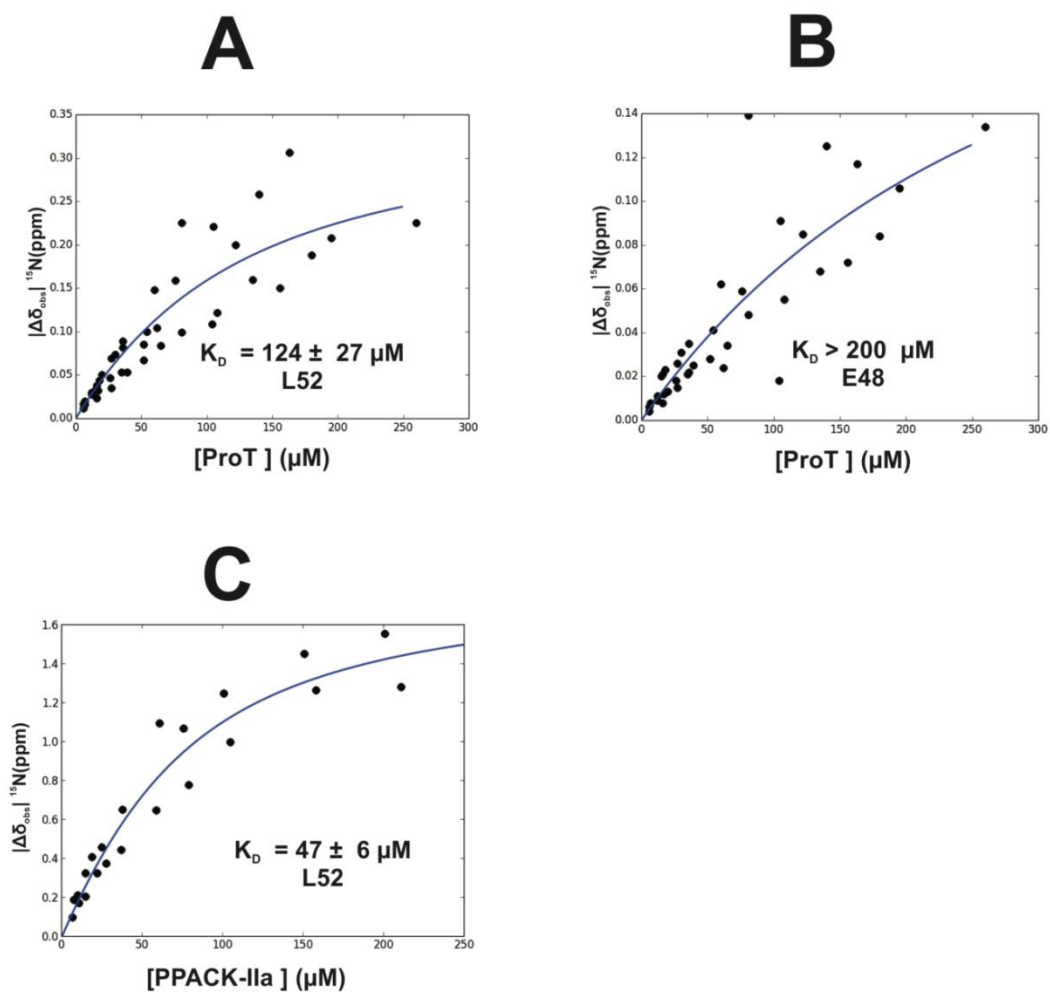

**Figure S7: Determination of Binding Affinity ( $K_D$ ) for  $^{15}\text{N}$ -labeled L52 and E48 of PAR3G<sub>FD</sub> interacting with Prothrombin and PPACK-IIa** For this NMR titration series, the peptide ligand concentration was kept constant and the ProT and PPACK-IIa concentrations were serially diluted. As a result, the NMR titrations were measuring the binding of protein to a defined peptide concentration. (A) Interactions between ProT and PAR3G  $^{15}\text{N}$ -L52 led to a  $K_D = 124 \pm 27 \mu\text{M}$ , (B) ProT and PAR3G  $^{15}\text{N}$ -E48 led to a  $K_D > 200 \mu\text{M}$ , and (C) PPACK-IIa and PAR3G  $^{15}\text{N}$ -L52 led to a  $K_D = 47 \pm 6 \mu\text{M}$ . NMR titrations were done in triplicate. The reported  $K_D$  values were determined using in-house scripts written using Python. The term  $|\Delta\delta_{\text{obs}}|^{15}\text{Nppm} = \delta^{15\text{N}}_{\text{Bound}} - \delta^{15\text{N}}_{\text{Free}}$  reflects the absolute difference in chemical shift between the bound and free states of the particular  $^{15}\text{N}$ -amide. Error analysis was carried out using a Monte-Carlo approach assuming a 10% error in the serially diluted protein samples. See Materials and Methods for more details.
